# Supplementary figures and images for: A novel electrochemical recycling strategy for NdFeB swarf with minimized chemical consumption
Source: Royal Society of Chemistry journal article supplement (doi:10.1039/d4gc04519j), 2025-01-01

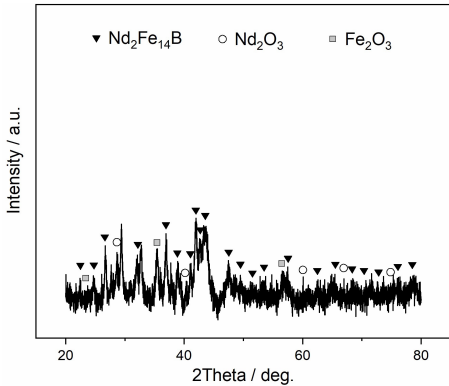

Supplement: d4gc04519j1.pdf [file d4gc04519j1.pdf]

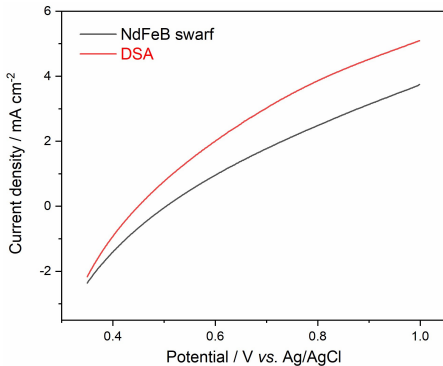

Supplement: d4gc04519j2.pdf [file d4gc04519j2.pdf]

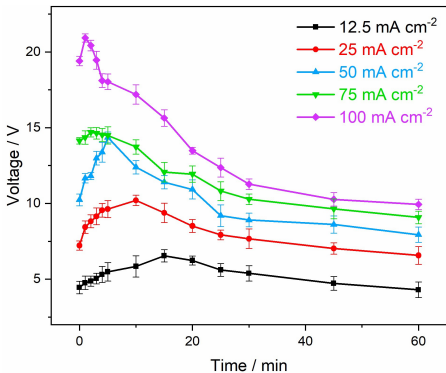

Supplement: d4gc04519j3.pdf [file d4gc04519j3.pdf]

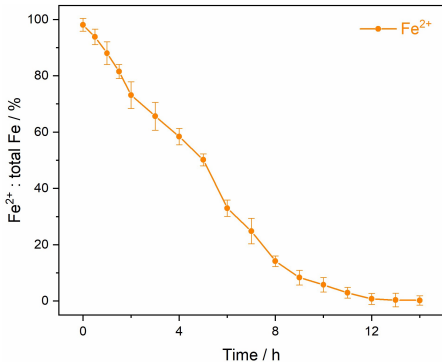

Supplement: d4gc04519j4.pdf [file d4gc04519j4.pdf]
